# Supplementary material for: Harmonization of exosome isolation from culture supernatants for optimized proteomics analysis
Source: PubMed Central journal article supplement (PMC6209201; doi:10.1371/journal.pone.0205496), 2018-10-31
Supplement: pone.0205496.s001.pdf [file pone.0205496.s001.pdf]

**Bovine sequences database**

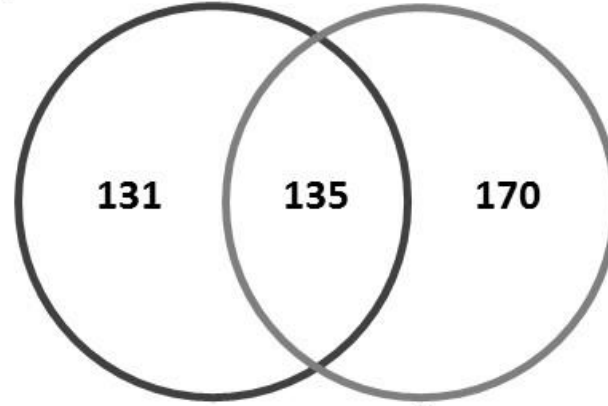

**Human sequences database**

**Gene names of overlapping proteins**

|        |        |        |         |        |       |        |          |       |          |         |        |          |         |        |
|--------|--------|--------|---------|--------|-------|--------|----------|-------|----------|---------|--------|----------|---------|--------|
| A2M    | ANXA11 | ARF6   | CD82    | COL6A3 | F2    | GNAS   | HSP90AA1 | ITIH2 | KRT4     | MFGE8   | RAB10  | RRAS2    | SLC3A2  | TUBB1  |
| ACAN   | ANXA2  | ARRDC1 | CD9     | CPNE8  | F5    | GNB1   | HSP90AB1 | ITIH3 | KRT5     | MSN     | RAB11A | S100A10  | SLC44A1 | TUBB4B |
| ACTB   | ANXA5  | ATP1A1 | CFL1    | CTNNA1 | FBLN1 | GNB2   | HSPA8    | JUP   | KRT77    | NEB     | RAB1B  | S100A14  | SLC44A2 | VCAN   |
| ACTG2  | ANXA7  | BSG    | CHMP5   | CTNND1 | FGB   | GP1BB  | IST1     | KRT1  | LAMA5    | NID1    | RAB5C  | SDC1     | SNPH    | VPS4B  |
| ADAM10 | APOA1  | C3     | CLDN4   | EEF1A1 | FGG   | GPC1   | ITGA2B   | KRT10 | LAMB2    | NRAS    | RAB7A  | SDCBP    | STOM    | VTA1   |
| AGRN   | APOB   | C9     | CLTC    | EGFR   | FLOT2 | GSTP1  | ITGA3    | KRT14 | LAMC1    | PDCD6   | RAP1A  | SERPINC1 | THBS1   | VTN    |
| AHSG   | APOC3  | CAV1   | COL18A1 | EPCAM  | FN1   | H2AFZ  | ITGA6    | KRT17 | LAMP2    | PDCD6IP | RAP1B  | SLC1A5   | TSG101  | VWF    |
| ALB    | APOE   | CD151  | COL1A1  | EPHA2  | GAPDH | H3F3C  | ITGB1    | KRT18 | LGALS3BP | PPIA    | RAP2B  | SLC2A1   | TSPAN14 | YWHAE  |
| ANXA1  | APOM   | CD81   | COL6A1  | F13A1  | GNAI2 | HAPLN1 | ITGB3    | KRT2  | MAMLD1   | PTGFRN  | RPL18  | SLC2A3   | TUBA4A  | YWHAZ  |
