# Supplementary material for: Harmonization of exosome isolation from culture supernatants for optimized proteomics analysis
Source: PubMed Central journal article supplement (PMC6209201; doi:10.1371/journal.pone.0205496), 2018-10-31

**a**

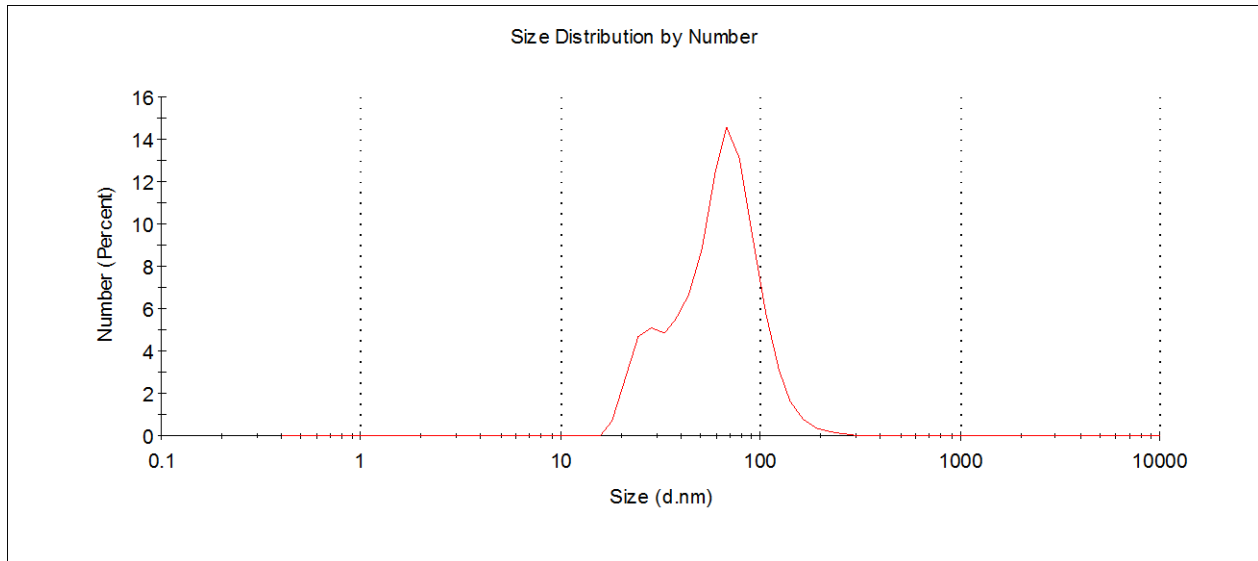

**b**

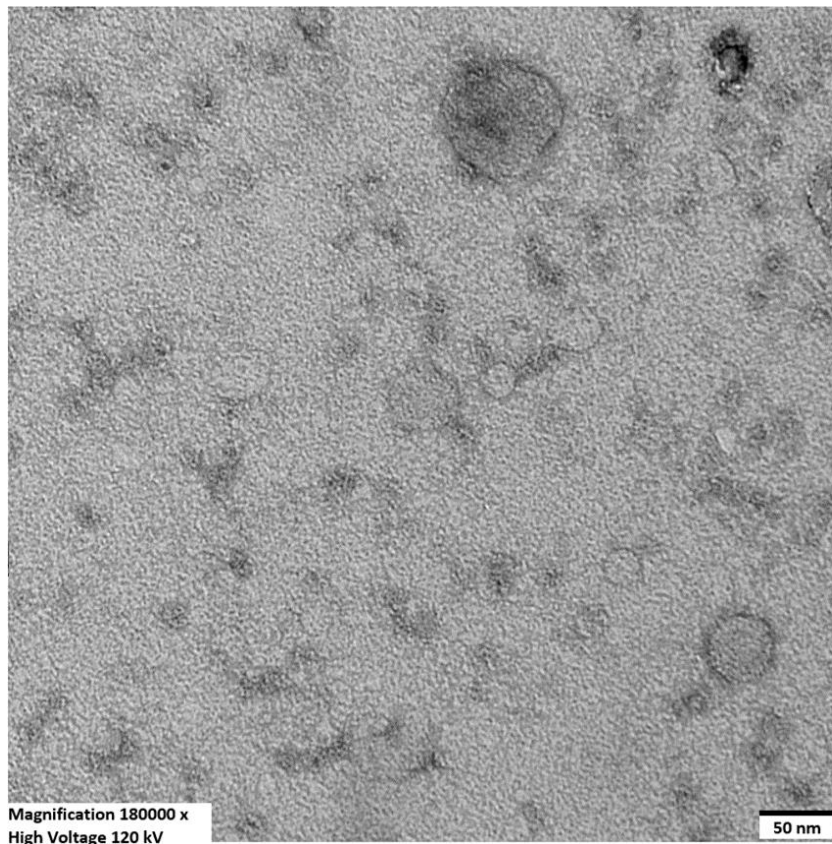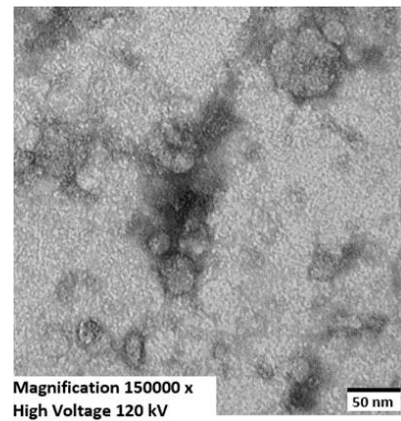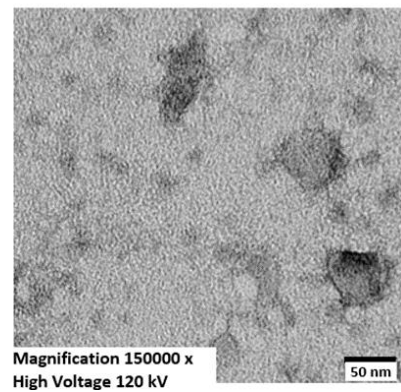

Supplement: pone.0205496.s002.pdf [file pone.0205496.s002.pdf]
